# Supplementary material for: Changes in cortical network connectivity with long-term brain-machine interface exposure after chronic amputation
Source: PubMed Central journal article supplement (PMC5703974; doi:10.1038/s41467-017-01909-2), 2017-11-27
Supplement: 41467_2017_1909_MOESM2_ESM.pdf [file 41467_2017_1909_MOESM2_ESM.pdf]

## **Description of Additional Supplementary Files**

File Name: Supplementary Movie 1

Description: Qualitative demonstration of Monkey Z (contralateral) controlling a multi-degree-of-freedom robot through a BMI

File Name: Supplementary Movie 2

Description: Qualitative performance comparing early and late BMI exposures in Monkey Z (contralateral)
